# Supplementary material for: The newborn brain is sensitive to the communicative function of language
Source: PubMed Central journal article supplement (PMC8786876; doi:10.1038/s41598-022-05122-0), 2022-01-24
Supplement: 41598_2022_5122_MOESM1_ESM.pdf [file 41598_2022_5122_MOESM1_ESM.pdf]

# Supplementary Information

## The Newborn Brain Is Sensitive to the Communicative Function of Language

Bálint Forgács\*, Tibor Tauszin, György Gergely, Judit Gervain

\*Corresponding author: Bálint Forgács

E-mail: [foragacs.balint@ppk.elte.hu](mailto:foragacs.balint@ppk.elte.hu)

Website: <https://sites.google.com/view/balint-foragacs>

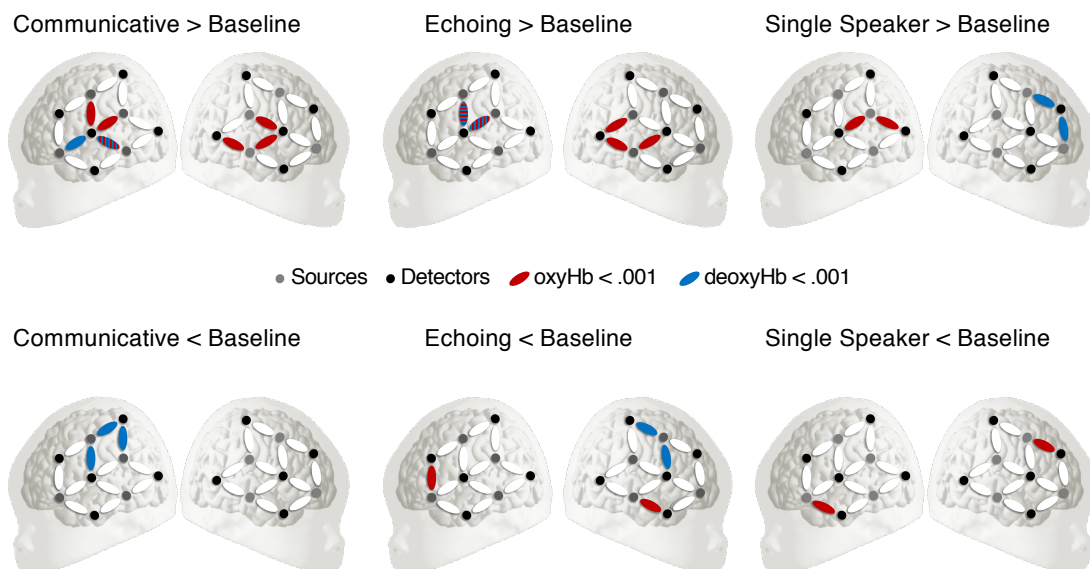

**Figure S1. Significant activations, compared to baseline, in the three conditions.**

Red indicates oxyHb and blue deoxyHb. For deoxyHb results Condition > Baseline means significantly more negative, that is, canonical responses than baseline, while for oxyHb Condition < Baseline means significantly more positive, that is, inverted, responses. Channels are plotted in the same layout as in Figure 2C. The neonate brain reacted significantly more to all three conditions than to baseline, primarily in the bilateral temporo-parietal areas.
